# Supplementary material for: Covalent functionalization of tin disulfide with porphyrin for ultrafast optical limiting
Source: Royal Society of Chemistry journal article supplement (doi:10.1039/d3tc00244f), 2023-01-01
Supplement: d3tc00244f1.pdf [file d3tc00244f1.pdf]

## Supporting Information

# Covalent Functionalization of Tin Disulfide with Porphyrin for Ultrafast Optical Limiting

Zhiyuan Wei,<sup>†</sup> Yan Fang,<sup>†</sup> Hui Li,<sup>†</sup> Zihao Guan,<sup>†</sup> Naying Shan,<sup>†</sup> Fang Liu,<sup>†</sup> Yang Zhao,<sup>†</sup> Lulu Fu,  
<sup>\*,†</sup> Zhipeng Huang,<sup>†</sup> Mark G. Humphrey,<sup>\*,‡</sup> Chi Zhang<sup>\*,†</sup>

<sup>†</sup> *School of Chemical Science and Engineering, Tongji University, Shanghai, 200092, China*

<sup>‡</sup> *Research School of Chemistry, Australian National University, Canberra, ACT 2601, Australia*

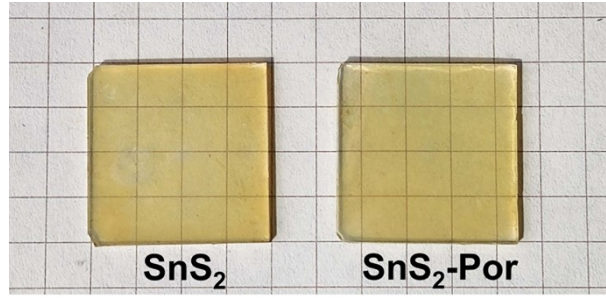

Figure S1. Photographs of the SnS<sub>2</sub> nanosheets and the SnS<sub>2</sub>-Por nanohybrid.

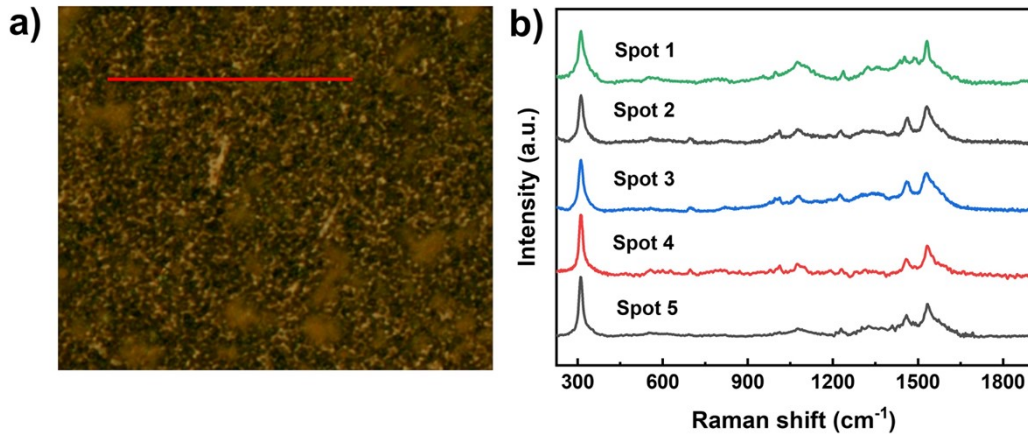

Figure S2. (a) The optical microscopy of the SnS<sub>2</sub>-Por nanohybrid. (b) The Raman spectra of 5 spots along the red line in (a).

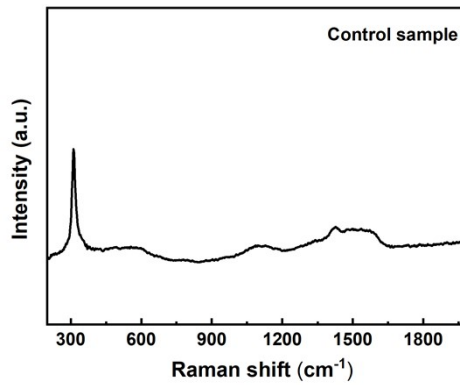

Figure S3. Raman spectrum of the control sample.

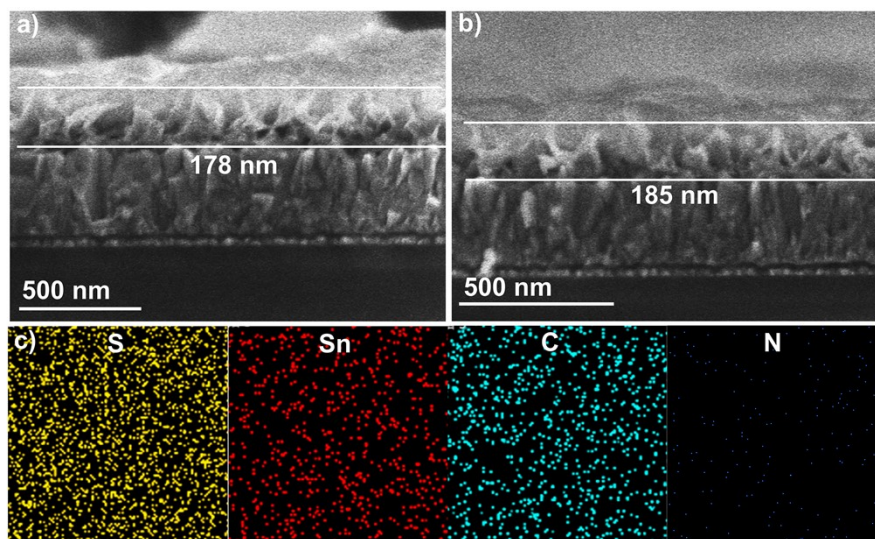

Figure S4. (a) Cross-sectional view SEM image of the SnS<sub>2</sub> nanosheets. (b) Cross-sectional view SEM image of the SnS<sub>2</sub>-Por nanohybrid. (c) Elemental mapping images of the SnS<sub>2</sub> nanosheets.

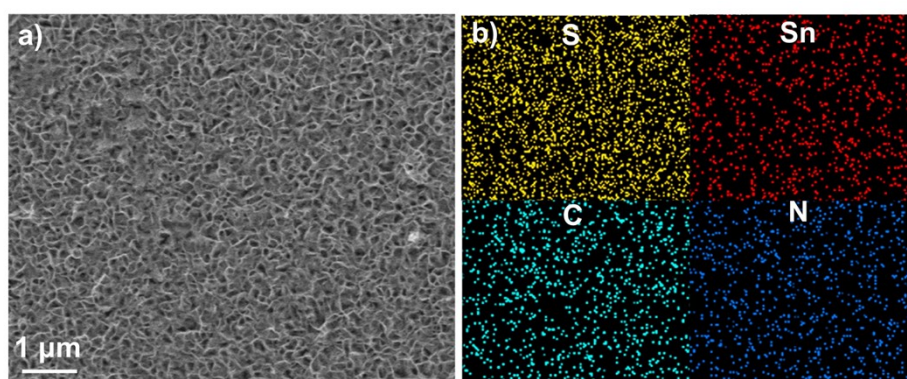

Figure S5. SEM image (a) and the corresponding elemental mapping images (b) of the SnS<sub>2</sub>-Por nanohybrid on a larger scale.

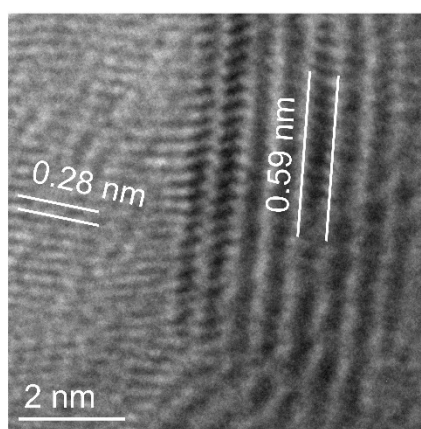

Figure S6. High-resolution TEM image of the SnS<sub>2</sub>-Por nanohybrid.

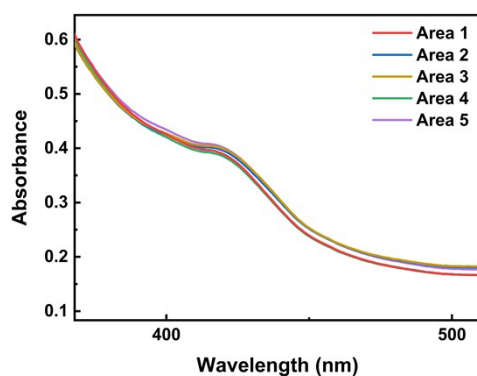

Figure S7. UV-Vis absorption spectra of the SnS<sub>2</sub>-Por nanohybrid at different areas.

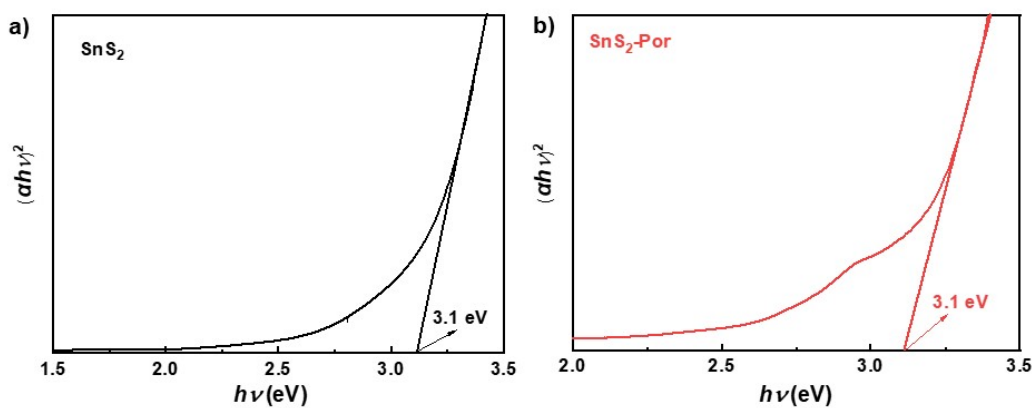

Figure S8. Tauc plots of the SnS<sub>2</sub> nanosheets (a) and the SnS<sub>2</sub>-Por nanohybrid (b).

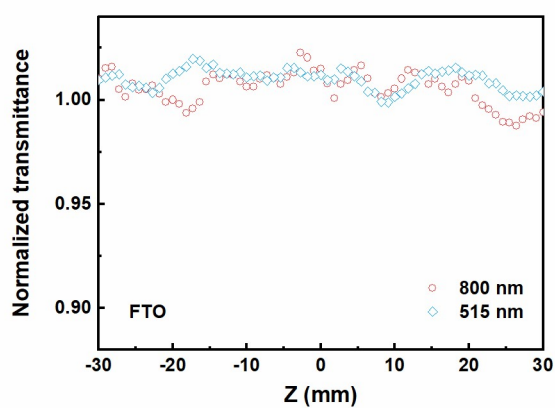

Figure S9. Open-aperture Z-scan curves of the FTO substrate at 800 nm with 56 nJ pulse energy and at 515 nm with 60 nJ pulse energy.

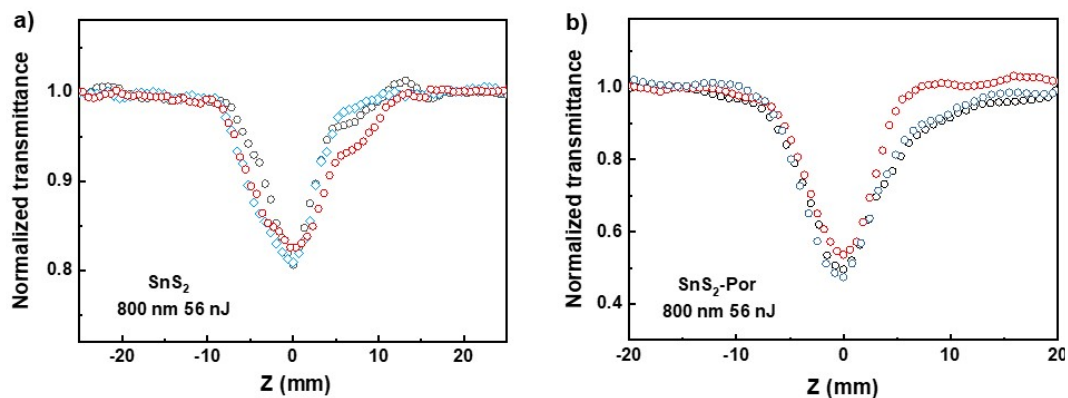

Figure S10. Open-aperture Z-scan curves measured at different points of the SnS<sub>2</sub> nanosheets (a) and the SnS<sub>2</sub>-Por nanohybrid (b).

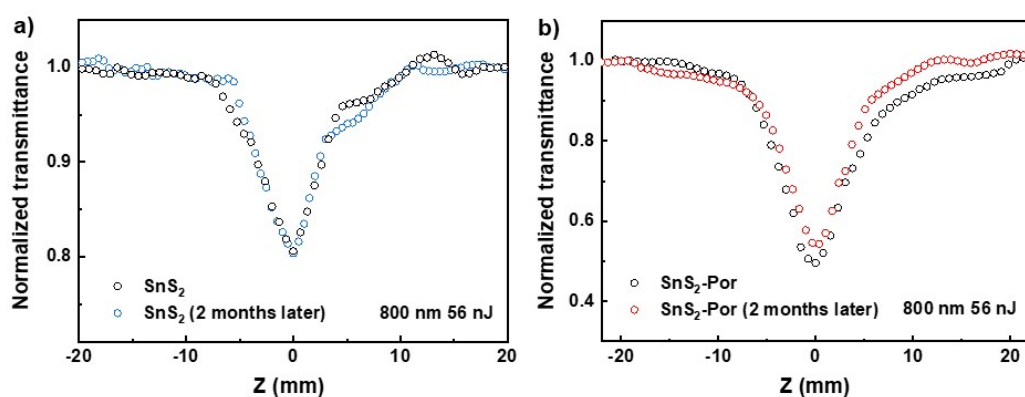

Figure S11. Open-aperture Z-scan curves of the SnS<sub>2</sub> nanosheets (a) and the SnS<sub>2</sub>-Por nanohybrid (b) before and after ambient exposure.

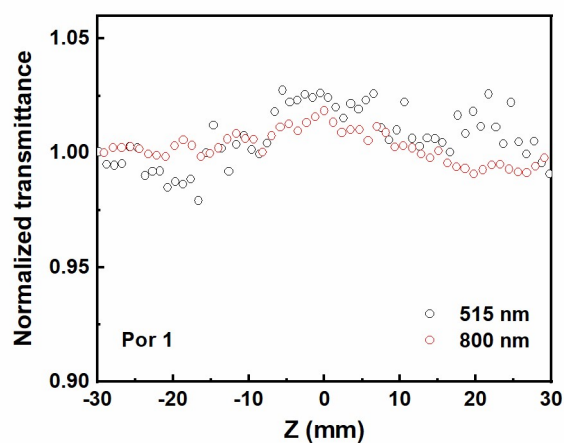

Figure S12. Open-aperture Z-scan curves of Por 1 solutions at 800 nm with 56 nJ pulse energy and at 515 nm with 60 nJ pulse energy.

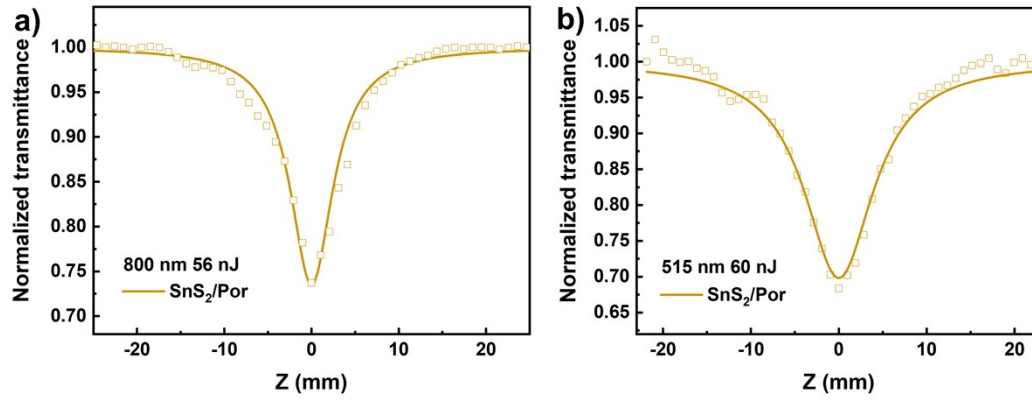

Figure S13. Z-scan curves of the SnS<sub>2</sub>/Por blend at 800 nm (a) and 515 nm (b).

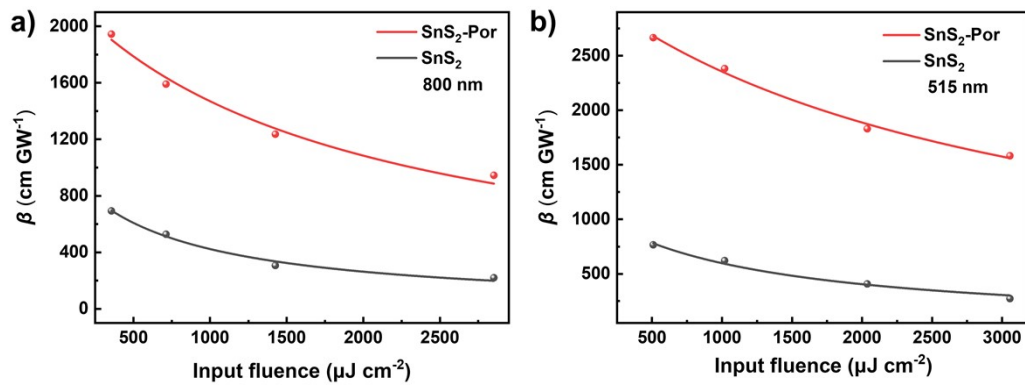

Figure S14. TPA saturation fitting at 800 nm (a) and 515 nm (b).

Table S1. Atom percentages of the SnS<sub>2</sub> nanosheets and the SnS<sub>2</sub>-Por nano hybrid.

| Element | Atom (%)         |                       |
|---------|------------------|-----------------------|
|         | SnS <sub>2</sub> | SnS <sub>2</sub> -Por |
| Sn 3d   | 14.21            | 11.70                 |
| S 2p    | 25.55            | 20.76                 |
| C 1s    | 37.81            | 43.53                 |
| O 1s    | 22.44            | 16.47                 |
| N 1s    | -                | 7.54                  |



Table S2. Optical limiting thresholds ( $F_{th}$ ) at selected wavelengths.

| Materials                                                                                                            | Laser               | $F_{th}$ (mJ cm <sup>-2</sup> ) |
|----------------------------------------------------------------------------------------------------------------------|---------------------|---------------------------------|
| SnS <sub>2</sub> -Por (this work)                                                                                    | 515 nm 35 fs 1 kHz  | 1.65                            |
| Azine derivative <sup>1</sup>                                                                                        | 515 nm 190 fs 20 Hz | 16                              |
| hydrazone derivative <sup>2</sup>                                                                                    | 515 nm 190 fs 20 Hz | 2.75                            |
| SWNTs <sup>3</sup>                                                                                                   | 532 nm 5 ns         | 250                             |
| SWNT-TPP <sup>3</sup>                                                                                                | 532 nm 5 ns         | 70                              |
| Graphene <sup>4</sup>                                                                                                | 532 nm 6 ns 10 Hz   | 800                             |
| Graphene-Zn-porphyrin <sup>4</sup>                                                                                   | 532 nm 6 ns 10 Hz   | 200                             |
| ZnTPyP-1/PDMS <sup>5</sup>                                                                                           | 532 nm 5 ns 5 Hz    | 320                             |
| WS <sub>2</sub> <sup>6</sup>                                                                                         | 532 nm 7 ns 10 Hz   | 880                             |
| GO:PVA <sup>7</sup>                                                                                                  | 400 nm 100 fs 1 kHz | 1.6                             |
| SnS <sub>2</sub> -Por (this work)                                                                                    | 800 nm 35 fs 1 kHz  | 2.74                            |
| MoS <sub>2</sub> /PMMA <sup>8</sup>                                                                                  | 800 nm 100 fs 1 Hz  | 35.2                            |
| WSe <sub>2</sub> <sup>9</sup>                                                                                        | 800 nm 130 fs 1 kHz | 21.6                            |
| Pc-pyrene PMMA film <sup>10</sup>                                                                                    | 800 nm 90 fs 1 kHz  | 1.8                             |
| Carbon nanodots <sup>11</sup>                                                                                        | 800 nm 100 fs 1 kHz | 74                              |
| GO films <sup>12</sup>                                                                                               | 800 nm 100 fs 1 kHz | 37                              |
| Al-doped InSe thin film <sup>13</sup>                                                                                | 800 nm 190 fs 10 Hz | 14                              |
| Li <sub>0.952</sub> Sn <sup>II</sup> <sub>0.398</sub> Sn <sup>IV</sup> <sub>0.563</sub> S <sub>2</sub> <sup>14</sup> | 800 nm 35 fs 1 kHz  | 0.8                             |

Table S3. Linear optical and NLO parameters of the SnS<sub>2</sub>/Por blend.

| Samples               | Laser        | $\alpha_0$ (cm <sup>-1</sup> ) | $T$ (%) | $\beta_{eff}$ (cm GW <sup>-1</sup> ) |
|-----------------------|--------------|--------------------------------|---------|--------------------------------------|
| SnS <sub>2</sub> /Por | 800 nm 56 nJ | 18833                          | 70      | 323 ± 10                             |
|                       | 515 nm 60 nJ | 30828                          | 55      | 409 ± 10                             |

Table S4. NLO parameters of the SnS<sub>2</sub> nanosheets and the SnS<sub>2</sub>-Por nanohybrid

| Laser        | Samples               | $\beta_0$ (cm GW <sup>-1</sup> ) | $I_s$ (μJ cm <sup>-2</sup> ) |
|--------------|-----------------------|----------------------------------|------------------------------|
| 800 nm 35 fs | SnS <sub>2</sub>      | 1083 ± 111                       | 641 ± 135                    |
|              | SnS <sub>2</sub> -Por | 2280 ± 117                       | 1815 ± 287                   |
| 515 nm 35 fs | SnS <sub>2</sub>      | 1140 ± 103                       | 1101 ± 215                   |
|              | SnS <sub>2</sub> -Por | 3129 ± 76                        | 3041 ± 246                   |

## Reference

1. Z. Xiao, J. Ge, R. Sun, Y. Fang, Y. She, Z. Li, X. Wu, S. Liu, L. Li, Y. Jian and Y. Song, *Opt. Mater.*, 2018, **83**, 300-305.
2. J. Jia, X. Wu, Y. Fang, J. Yang, X. Guo, Q. Xu, Y. Han and Y. Song, *J. Phys. Chem. C*, 2018, **122**, 16234-16241.
3. Z. B. Liu, J. G. Tian, Z. Guo, D. M. Ren, T. Du, J. Y. Zheng and Y. S. Chen, *Adv. Mater.*, 2008, **20**, 511-515.
4. M. B. M. Krishna, V. P. Kumar, N. Venkatramaiah, R. Venkatesan and D. N. Rao, *Appl. Phys. Lett.*, 2011, **98**, 081106.
5. D. J. Li, Q. H. Li, Z. R. Wang, Z. Z. Ma, Z. G. Gu and J. Zhang, *J. Am. Chem. Soc.*, 2021, **143**, 17162-17169.
6. T. Abhijith, S. E. R. Suthar, P. Sharma, S. Thomas, S. Karak, *Nanotechnology*, 2022, **33**, 435702.
7. X.-F. Jiang, L. Polavarapu, H. Zhu, R. Ma and Q.-H. Xu, *Photonics Res.*, 2015, **3**, A87-A91.
8. G. Liang, L. Tao, Y. H. Tsang, L. Zeng, X. Liu, J. Li, J. Qu and Q. Wen, *J. Mater. Chem. C*, 2019, **7**, 495-502.
9. X. Tian, R. Wei, Q. Guo, Y. J. Zhao and J. Qiu, *Adv. Mater.*, 2018, **30**, 1801638.
10. A. Husain, A. Ganesan, M. Sebastian and S. Makhseed, *Dyes Pigm.*, 2021, **184**, 108787.
11. D. Tan, Y. Yamada, S. Zhou, Y. Shimotsuma, K. Miura and J. Qiu, *Carbon*, 2014, **69**, 638-640.
12. X. F. Jiang, L. Polavarapu, S. T. Neo, T. Venkatesan and Q. H. Xu, *J. Phys. Chem. Lett.*, 2012, **3**, 785-790.
13. X. Yan, X. Wu, Y. Fang, W. Sun, C. Yao, Y. Wang, X. Zhang and Y. Song, *Opt. Mater.*, 2020, **108**, 110171.
14. M. Diao, H. Li, X. Gao, R. Hou, Q. Cheng, Z. Yu, Z. Huang and C. Zhang, *Adv. Funct. Mater.*, 2021, **31**, 2106930.
